# Supplementary material for: A Low-Protein Diet Enhances Angiotensin II Production in the Lung of Pregnant Rats but Not Nonpregnant Rats
Source: Hindawi journal article supplement (doi:10.1155/2016/4293431), 2016-01-01
Supplement: f1 [file 4293431.f1.pdf]

A)

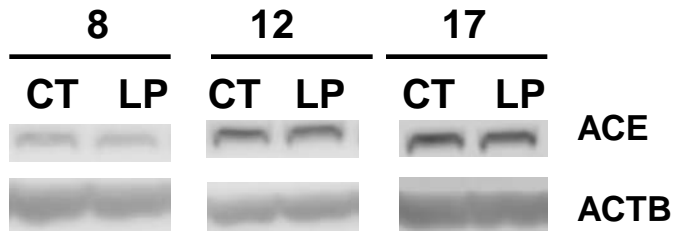

C)

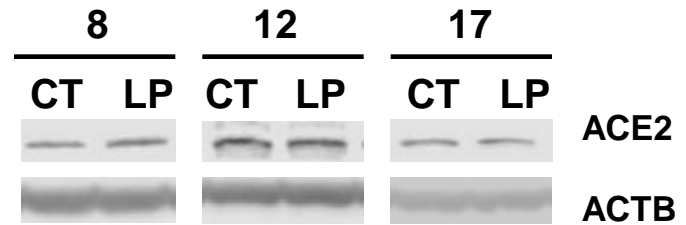

B)

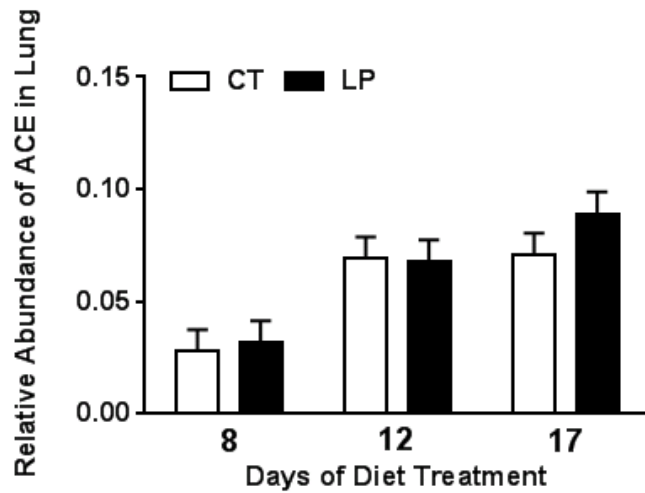

D)

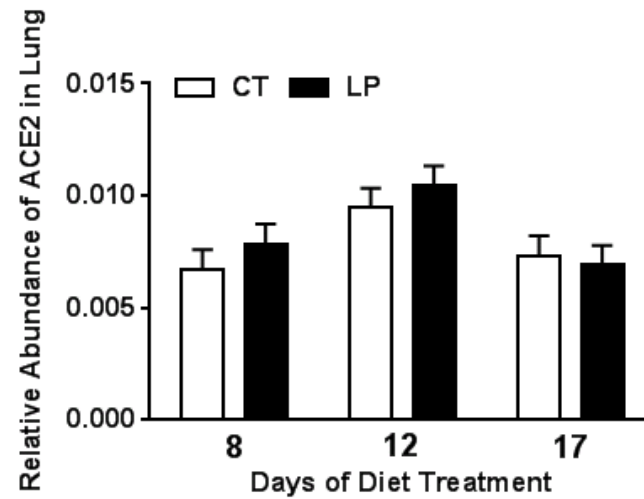

A)

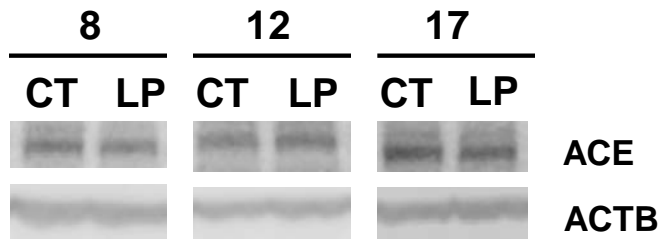

C)

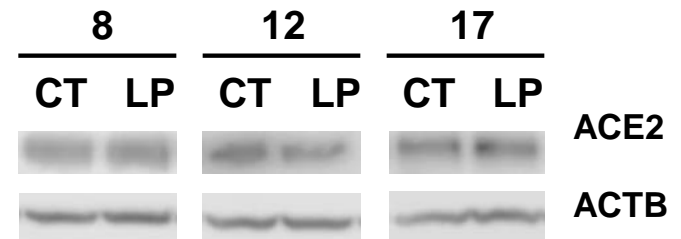

B)

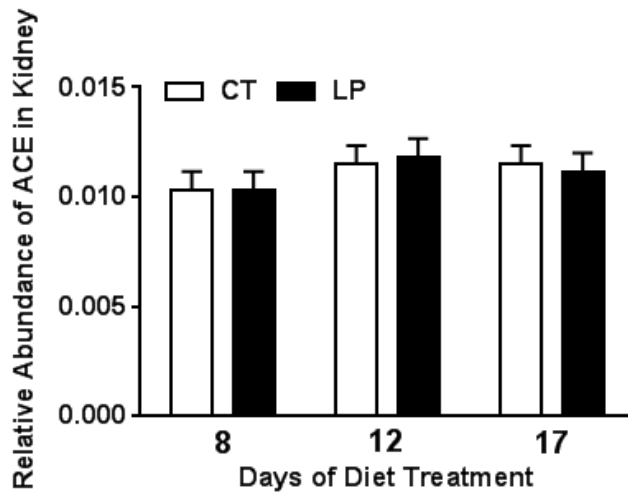

D)

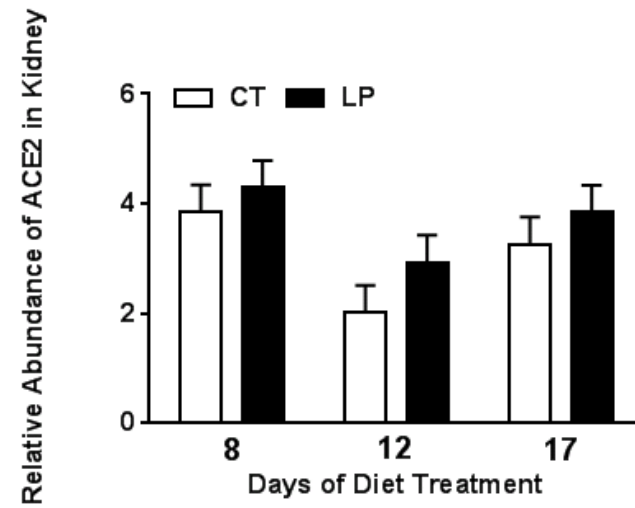

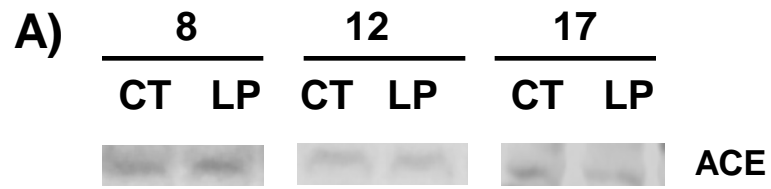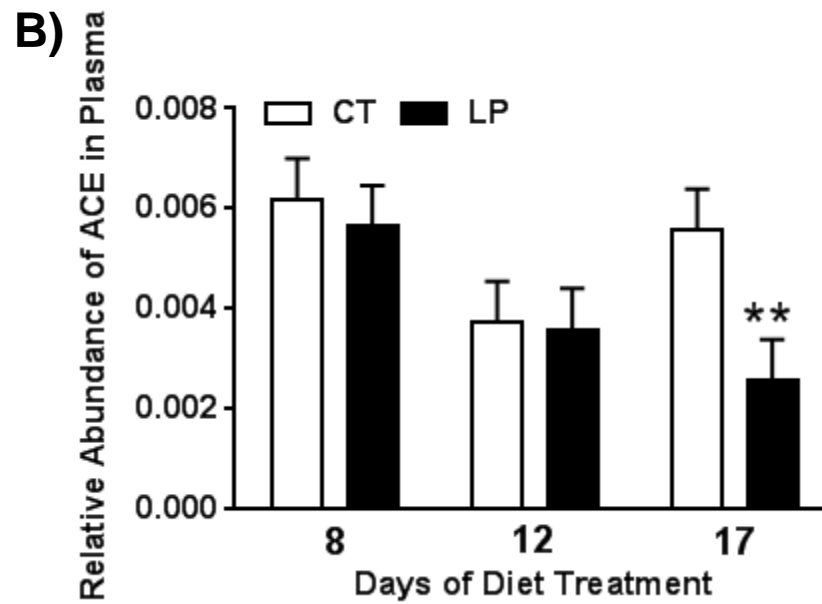

Supplementary Figure 3
